1    **Microbiome-based environmental monitoring of a dairy processing facility**  
2    **highlights the challenges associated with low microbial-load samples**

3

4    Aoife J. McHugh<sup>a,b</sup>, Min Yap<sup>a,b</sup>, Fiona Crispie<sup>a,c</sup>, Conor Feehily<sup>a,c</sup>, Colin Hill<sup>b,c</sup> and Paul  
5    D. Cotter<sup>a,c\*</sup>

6    a Food Bioscience Department, Teagasc Food Research Centre, Cork, Ireland

7    b School of Microbiology, University College Cork, Cork, Ireland

8    c APC Microbiome Ireland, Cork, Ireland

9

10    \*Corresponding author

11

## 12 **Abstract**

13 Food processing environments can harbor microorganisms responsible for food  
14 spoilage or foodborne disease. Efficient and accurate identification of  
15 microorganisms throughout the food chain can allow the identification of sources  
16 of contamination and the timely implementation of control measures. Currently,  
17 microbial monitoring of the food chain relies heavily on culture-based techniques.  
18 These assays are determined on the microbes expected to be present in the  
19 environment, and thus do not cater for unexpected contaminants. Many culture-  
20 based assays are also unable to distinguish between undesirable taxa and closely  
21 related harmless species. Furthermore, even when multiple culture-based  
22 approaches are used in parallel, it is still not possible to comprehensively  
23 characterize the entire microbiology of a food-chain sample.

24 High throughput DNA sequencing represents a potential means through which  
25 microbial monitoring of the food chain can be enhanced. While sequencing  
26 platforms, such as the Illumina MiSeq, NextSeq and NovaSeq, are most typically  
27 found in research or commercial sequencing laboratories, newer portable  
28 platforms, such as the Oxford Nanopore Technologies (ONT) MinION, offer the  
29 potential for rapid analysis of food chain microbiomes. In this study, having initially  
30 assessed the ability of rapid MinION-based sequencing to discriminate between  
31 different microbes within a simple mock metagenomic mixture of related food  
32 spoilage, spore-forming microorganisms. Subsequently, we proceeded to compare  
33 the performance of both ONT and Illumina sequencing for environmental  
34 monitoring of an active food processing facility.

35 Overall, ONT MinION sequencing provided accurate classification to species level,  
36 which was comparable to Illumina-derived outputs. However, while the MinION-  
37 based approach provided a means of easy library preparations and portability, the  
38 high concentrations of DNA needed to run the rapid sequencing protocols was a  
39 limiting factor, requiring the random amplification of template DNA in order to  
40 generate sufficient material for analysis.

## 41 **Introduction**

42 Dairy processing environments harbor microorganisms that have the potential to  
43 contaminate food before and during processing (Gleeson, O'Connell and Jordan,  
44 2013; Doyle *et al.*, 2017; Faille *et al.*, 2014; Wang *et al.*, 2019; Fysun *et al.*, 2019).  
45 Some of these microorganisms have the potential to cause spoilage or be  
46 pathogenic (Doyle *et al.*, 2015; Cho *et al.*, 2018; Sadiq *et al.*, 2016; Burgess, Lindsay  
47 and Flint, 2010). Routine environmental monitoring is carried out in food processing  
48 environments for this reason, and usually involves the use of swabbing and agar  
49 plating to determine total numbers of general (e.g., total bacteria count) or specific  
50 (generally potentially spoilage-associated or pathogenic species) categories of  
51 microorganisms (Cho *et al.*, 2018). These analyses frequently involve phenotype-  
52 based agar assays, some of which can yield high false positive rates (Doyle, O'Toole  
53 and Cotter, 2018; Tallent *et al.*, 2012). These approaches are further limited by the  
54 fact that they do not provide information about non-targeted species or indeed the  
55 microbial population as a whole.

56 DNA sequencing methods have recently been applied to dairy and environmental  
57 samples to determine the microbial population composition and enable source  
58 tracking (Doyle *et al.*, 2017; McHugh *et al.*, 2018; Fretin *et al.*, 2018; Cho *et al.*,  
59 2018, McHugh *et al.*, 2020). High throughput metagenomic sequencing can provide  
60 greater insights into the taxonomic composition of populations present in these  
61 environments than culture based methods. Specifically it uncovers information  
62 relating to the functional potential of species and strains present, including  
63 virulence and spoilage properties. Despite these benefits, high throughput

64 metagenomic sequencing approaches typically require expensive reagents and  
65 platforms as well as personnel skilled in molecular biology, data generation and  
66 interpretation. These requirements limit their routine implementation in  
67 manufacturing facilities. Some of these issues have the potential to be addressed  
68 through use of portable DNA sequencing devices such as the Oxford Nanopore  
69 Technologies (ONT) MinION. The MinION's portability and work flows are designed  
70 to facilitate their use by less experienced personnel and could allow easier  
71 detection and identification of the causative agents of microbial contamination.  
72 Such approaches have recently been tested in a clinical setting to identify causative  
73 agents of disease from metagenomic samples (Charalampous *et al.*, 2019), including  
74 studies where the results were compared with those generated through Illumina  
75 sequencing (Quick *et al.*, 2017; Kafetzopoulou *et al.*, 2018) or culture-based analysis  
76 (Sanderson *et al.*, 2018). This approach has yet to be applied to food processing  
77 settings for environmental monitoring.

78 As a proof-of-concept, we conducted a study to determine the ability of MinION-  
79 based rapid sequencing to correctly classify a simple, four strain, mock community  
80 of highly related spore-forming microorganisms of relevance to the dairy processing  
81 chain. Prompted by this initial analysis, we proceeded to compare the outputs of  
82 MinION-based rapid sequencing to Illumina-based, and culture-based methods to  
83 characterize the microbiota of environmental swabs collected from a food  
84 processing facility. Overall, MinION-based approaches were comparable to the  
85 Illumina sequencing equivalent in terms of species level taxonomic classification.  
86 However, the requirement of high concentration and quality input DNA for the

87 routine implementation of MinION sequencing was a limitation due to the  
88 environment tested. To overcome this, random amplification of template DNA was  
89 required. Regardless, the potential benefits of the routine application of  
90 metagenomic sequencing to food processing environments were clear.

## 91 **Results**

### 92 **MinION sequencing accurately identified, and distinguished between, genomic**

### 93 **DNA from four related, dairy environment-associated, sporeformers**

94 Metagenomic DNA representing a simple mock community of 4 related dairy  
95 processing-associated, spore-forming contaminants, i.e., *Bacillus cereus*, *Bacillus*.  
96 *thuringiensis*, *Bacillus licheniformis*, *Geobacillus stearothermophilus*, was sequenced  
97 using ONT MinION rapid sequencing kits. This proof-of-concept exercise was  
98 performed to determine the extent to which MinION-based sequencing could  
99 identify, and discriminate between, related, and in some cases difficult to  
100 distinguish, microorganisms found in dairy processing environments. Amplicon 16S  
101 rRNA-based sequencing of the simple mock metagenomic DNA using the ONT 16S  
102 barcoding kit SQK-RAB204 resulted in 996,441 reads following rebasecalling by  
103 albacore. These reads contained a total of 1,454,835,092 bases with an average  
104 read length of 1460 bp and a median read length of 1561 bp. 16S rRNA reads  
105 aligned by BLASTn to the Silva 16S database (version 132) with MEGAN 6  
106 classification resulted in successful identification of three out of the 4 species. The  
107 fourth strain, *G. stearothermophilus* DSM 458, was correctly identified to the genus  
108 level only (Figure 1A).

109 Rapid whole metagenome sequencing (WMGS) of the mock community using the  
110 SQK-RAD004 kit resulted in 97,503 reads following rebasecalling by albacore and  
111 adaptor removal. These 97,503 reads contained a total of 750,359,905 bases with  
112 an average read length of 7696 bases and a median of 5762 bases. LAST alignment  
113 against the nr database followed by MEGAN long read (LR) lowest common

114 ancestor (LCA) analysis resulted in 74.76% bases being classified to some taxonomic  
115 level. Of these, 42.63% were classified to species level, 46.28% classified to species  
116 group level and 8.15% classified to genus level, accounting for 97.06% of classified  
117 reads. 64.37% of bases classified to genus level only were attributed to *Geobacillus*,  
118 with the remaining 35.63% classified as *Bacillus* (Figure 1B). Of the sequences  
119 classified to the species level, 57.26% of bases were attributed to *Bacillus*  
120 *thuringiensis*, 14.74% were attributed to *Bacillus licheniformis*, 13.98% were  
121 attributed to *Bacillus cereus*, 13.8% were attributed to *Geobacillus*  
122 *stearothermophilus* and, 0.21% misassigned as *Bacillus paralicheniformis* (Figure  
123 1B). *De novo* assembly of raw reads from the rapid sequencing reads using the canu  
124 (version 1.7) assembler (Koren *et al.*, 2017) resulted in 104 contigs and mapping  
125 back of reads to references resulted in good coverage up to 97% identity (Figure  
126 1C). The 4 reference strains genomes included 6 plasmids, corresponding to 10  
127 contiguous stretches of DNA. Nine of these 10 contigs were identified following  
128 sequence assembly, the exception being pBClin15, a 15 kb plasmid from *B. cereus*  
129 (Figure 1C). 99.59% of the assembled bases aligned to the reference genomes and,  
130 of the reference genomes, 98.27% aligned to the assembled MinION sequences  
131 (Supplemental Table 1).

### 132 **Shotgun sequencing of environmental dairy processing samples through MinION** 133 **and NextSeq sequencing provided comparable taxonomic classifications**

134 Prompted by the successful use of MinION-based sequencing to characterise the  
135 mock metagenomic community DNA, the technology was applied to study the  
136 microbiota of a food processing facility and to compare outputs with those derived



137 through NextSeq (Illumina)-based sequencing. Eight locations in a single processing  
138 facility were swabbed on three different days across October, November, and  
139 December 2018, each after cleaning in place (CIP) but before the next round of  
140 dairy processing (Figure 2). These eight locations comprised a table, door, wall,  
141 gaskets/flow plate seals, external surface of dryer balance tank, internal surface of  
142 dryer balance tank, external surface of evaporator, and drain beside evaporator.  
143 These swabs were prepared for sequencing, along with a series of negative controls  
144 and a positive control, consisting of the simple mock metagenomic community used  
145 previously. For MinION sequencing, rapid sequencing of multiple displacement  
146 amplification (MDA)-generated template DNA from 36 samples, used to address the  
147 relatively high quantities of DNA required for library preparation, was carried out  
148 using the SQK-RBK004 rapid barcoding sequencing kit. After processing, a total of  
149 899,306 reads were generated, containing a total of 1,648,724,928 bases with an  
150 average read length of 1,833 bases and median of 926 bases per read (and an  
151 average of 45,797,915 bases and 24,980.7 reads per sample). LAST alignment  
152 against the nr database followed by MEGAN long read (LR) lowest common  
153 ancestor (LCA) analysis resulted in 62% of bases being classified to some taxonomic  
154 level. Of these, 29.11% were classified to species level and 38.36% classified to  
155 genus level, accounting for 67.47% of classified reads. A total of 59 species were  
156 detected at > 5% relative abundance in at least one sample by MEGAN  
157 (Supplemental Figure 2).

158 Other shotgun sequencing-based approaches were employed to study the  
159 microbiomes of these environmental samples for comparative purposes. These

160 included Illumina-based sequencing of MDA and non-MDA DNA, as well as of  
161 metagenomic DNA extracted from easily cultured metagenomic DNA to allow a  
162 comparison with the species that grow when traditional culturing-based  
163 approaches are employed. This Illumina (NextSeq)-based sequencing of 93 samples  
164 produced 734,909,370 reads containing 150 bases each with an average of  
165 7,902,251 reads per sample. To allow a comparison with MinION outputs, and to  
166 avoid discrepancies through use of different bioinformatic pipelines, Diamond  
167 alignment against the nr database followed by MEGAN 6 lowest common ancestor  
168 (LCA) analysis was employed and resulted in 78% reads being classified to some  
169 taxonomic level. Of these, 10.8% were classified to the species level and 39.6%  
170 classified to the genus level, accounting for 50.3 % of classified bases. In  
171 comparison, Kraken2 and Bracken classification resulted in 61% reads classified to  
172 some taxonomic level, with 99% of those classified being classified to species level.  
173 This approach did not correctly classify the composition of the mock community  
174 (positive control) (Supplemental Figure 3). Similarly, MetaPhlan2 did not correctly  
175 classify all of the species of the mock community (Supplemental Figure 4), with  
176 both classifiers incorrectly classifying at least one species. Interestingly, both  
177 classifiers misclassified different species, whereby Bracken misclassified *B.*  
178 *licheniformis* as a *Bacillus* phage, and MetaPhlan2 did not differentiate between *B.*  
179 *cereus* and *B. thuringiensis*. Additionally, MetaPhlan2 only classified the *G.*  
180 *stearothermophilus* to genus level.

181 Using the MEGAN classification, which correctly classified the simple mock  
182 community, 108 species were identified at > 5% relative abundance in at least one

183 sample from all MinION and NextSeq sequenced samples (Figure 3). Species level  
184 classification by MEGAN revealed consistencies between corresponding NextSeq-  
185 and MinION-sequenced samples (Figure 3). Overall, reads corresponding to *Kocuria*  
186 *sp.* WRN011 were detected at the highest relative abundance. This taxon was  
187 detected in multiple locations, at each time-point, in both the MinION, and  
188 corresponding NextSeq, MDA-generated samples. Its relative abundance was  
189 highest in the evaporator drain samples at each time point. *Kocuria sp.* ZOR0020  
190 was present in high relative abundance in external dryer balance tank swabs in both  
191 MinION- and NextSeq-MDA sequenced MDA samples (Figure 3). Other dominant  
192 species included *Acinetobacter johnsonii* in gasket/flow plate seals (MinION and  
193 Illumina), *Micrococcus luteus* in evaporator drain (MinION and Illumina sequenced  
194 samples), *Enterococcus faecium* from the inside of the dryer balance tank as well as  
195 many other October and November samples (MinION and MDA amplified Illumina  
196 sequencing), *Klebsiella pneumonia* in many December samples regardless of  
197 sequencing approach and *Enterococcus casseliflavus* in many samples from October  
198 and November (high relative abundance in MinION sequenced samples and at  
199 lower abundance in the corresponding MDA Illumina sequenced samples) (Figure  
200 3). *Exiguobacterium sibiricum* was also detected in high relative abundance in  
201 MinION sequenced October and November door samples. It was also at lower  
202 relative abundances in many other October and November samples and in the  
203 corresponding Illumina sequenced door samples.

204 There were some notable sequencing platform-dependent differences.  
205 *Exiguobacterium sp.* S3.2 and *Pseudochrobactrum sp.* B5 were present at higher

206 relative abundance in October and November MDA Illumina NextSeq sequences  
207 compared to MinION sequences and *Enterobacter sp.* HK169 was detected in  
208 December MinION samples, but not corresponding Illumina samples (Figure 3).  
209 Species level taxonomic identification was performed on negative controls also.  
210 Many species were specific to negative controls, including *Kribbia dieselivorans* and  
211 *Cytophagales bacterium* B6, detected at a high relative abundance in MinION  
212 sequenced MDA negative controls, and *Paenibacillus fonticola*, detected at high  
213 relative abundance in both MinION and Illumina sequenced MDA negative controls.  
214 There was also a high relative abundance of *Escherichia coli* in MDA negative  
215 controls, with *Salmonella enterica* in the December samples, in both MinION  
216 sequences and corresponding Illumina sequences. *Ralsonia insidiosa* was also seen  
217 above 0.2% exclusively in negative controls. However, there was some overlap with  
218 species identified in negative controls also identified in environmental samples. In  
219 particular, the swab negative control for both MDA MinION and MDA NextSeq from  
220 each month are similar to results generated from swabbing of the internal of the  
221 dryer balance tank, which are the environmental samples with the lowest  
222 environmental load (Supplemental Table 2). *Kocuria sp.*, *Acinetobacter johnsonii*,  
223 *Enterococcus casseliflavus*, *Klebsiella pneumoniae*, *Exiguobacterium sibiricum*,  
224 *Enterococcus casseliflavus*, *Pseudochrobctrum sp* B5, *Enterobacter sp* HK169 and  
225 *Raoultella planticola* are all seen in negative controls (Figure 3). These findings  
226 highlight the risks of relying on data from samples with a low microbial load and the  
227 importance of including negative controls.

228 Metagenome-assembled genomes (MAGs) were extracted from assemblies of  
229 combined Illumina MDA and MinION MDA sequences. This resulted in 162 bins, of  
230 which 10 were high quality at > 80% complete and < 10% contamination (Table 1). 7  
231 of the 10 MAGs were from environmental isolates, with 3 out of 10 being the  
232 positive control species used. From the remaining MAGs, 3 out of 7 environmental  
233 isolates could not be definitively assigned at the species level, being assigned as  
234 each of a number of species at similar levels of relative abundances. These MAGs  
235 were assigned at the genus level as *Planococcus*, *Exiguobacterium* and *Kocuria* and  
236 were sourced from the October evaporator drain, gasket/flow plate seal and  
237 external dryer balance tank, respectively. The MAGs that were assigned at the  
238 species level were an *Enterococcus casseliflavus* from the October table swab  
239 sample, a *Paracoccus chinensis* from the November evaporator drain, a *Micrococcus*  
240 *casseeolyticus* from the November gasket/flow plate seal and a *Nesterenkonia*  
241 *massiliensis* from the November external of dryer balance tank sample (Table 1).

#### 242 **MDA amplification introduced bias towards the detection of some species**

243 In order to determine the potential for bias arising from MDA pre-processing,  
244 outputs from MDA-generated NextSeq sequencing were compared to non-MDA  
245 derived NextSeq (NPP). Higher relative abundances of *Pseudochrobactrum sp. B5*  
246 and *Pseudochrobactrum sp. AO18b* were seen in October and November NPP  
247 samples compared to the MDA-amplified equivalents (Figure 3). Overall, the NPP  
248 samples we found to be less diverse than their MDA counterparts (Figure 4A).

249 **Culture-based analyses introduced a selection bias**

250 In order to determine to what extent culture-dependent and –independent  
251 approaches provided different outputs, a comparison between NPP NextSeq-  
252 generated sequences and those resulting from sequencing of pools of easily  
253 cultured colonies (Plate samples) was performed. Sequences generated from Plate  
254 samples were noted to be significantly less diverse (Figure 4A), however the Plate  
255 samples clustered with the non-cultured samples when beta-diversity was analysed  
256 (Figure 4B). A number of the species detected were similar to species identified in  
257 the corresponding non-cultured samples (NPP and MDA amplified). Overall, *Kocuria*  
258 *sp* WRN011, was detected in all samples in which it had previously been identified  
259 through culture-independent approaches. *Enterococcus faecium*, the species found  
260 at highest relative abundance in all internal dryer balance tank samples from  
261 November (i.e., MDA MinION, NextSeq MDA, NPP and Plate; Figure 3) was also  
262 detected. Pre-culturing enriched some species that had been identified at low  
263 relative abundance in metagenomic NPP and MDA samples. These included  
264 *Planococcus massiliensis* (October door sample), *Microbacterium oxydans*  
265 (November Table sample), *Acinetobacter baumannii* (November external dryer  
266 balance tank) and *Lysinibacillus sp* B2A1 (December internal dryer balance tank;  
267 Figure 3).

268 **Genus level classification highlighted further culture-based selection bias**

269 As some genera could not be distinguished at species level, genus level assignments  
270 were also investigated and compared. MEGAN LCA analysis identified sequences  
271 that could not be more accurately classified to species level, and assigned these as

272 far as genus level only. A combined 56 genera were identified between MinION,  
273 NextSeq (both at > 5% relative abundance) and Sanger sequencing. Fifteen of these  
274 56 genera were identified in samples from all 3 sequencing types (Supplemental  
275 Figure 5). Sanger sequencing involved partial 16S rRNA sequencing of  
276 morphologically different colonies from BHI plates, including total spread plate  
277 (TBC), thermophilic enriched spore pasteurised (ST) and mesophilic enriched spore  
278 pasteurised (SM) tests (Supplemental Table 2; Figure 5). There was agreement  
279 between Sanger sequencing of isolates and next generation sequencing of plate  
280 samples with respect to *Kocuria*, *Acinetobacter* and *Lysinibacillus* (Figure 5). Some  
281 genera identified in Plate NextSeq samples and Sanger sequences had not been  
282 seen in high relative abundance in corresponding culture-independent NextSeq or  
283 MinION sequencing. These included *Microbacterium* in the November table sample  
284 and *Lysinibacillus* in the December internal dryer balance tank (Figure 5).

285 Overall, Sanger sequencing of 16S variable region of TBC isolates corresponded well  
286 with NextSeq 'Plate' sequencing but fewer genera were identified per sample. This  
287 may in part be due to only very morphologically distinct isolates being selected for  
288 Sanger sequencing. Counts per swab are also included. At all timepoints the  
289 gasket/flow plate seals and the evaporator drains had highest CFU / swab, with on  
290 average  $3.18 \times 10^7$  CFU / swab and  $1.82 \times 10^8$  CFU / swab each. These two areas  
291 also had the highest mesophilic spore count with an average of  $1.17 \times 10^4$  CFU /  
292 swab and  $3.64 \times 10^4$  CFU / swab each (Figure 5, Supplemental Table 2).

293 **Relatively few significant differences in relative abundance of species and genus**

294 **level taxonomic classification due to sequencing and pre-processing approaches**

295 Overall, only 6 out of 108 species had significantly different relative abundance  
296 between environmental samples (excluding controls) due to sample processing or  
297 sequencing method, based on Pairwise Wilcoxon rank sums test using Benjamini  
298 Hochberg  $p$ -value correction analysis of sequential pairs (Supplemental Figure 6).

299 *Enterococcus casseliflavus*, *Acinetobacter lwoffii* and *Acinetobacter johnsonii* had  
300 significantly higher relative abundance in MDA MinION sequenced samples than  
301 MDA NextSeq sequenced samples, whereas *Kocuria sp.* WRN011 was identified at  
302 significantly higher relative abundance in MDA NextSeq samples than MDA MinION  
303 samples. *Pseudochrobactrum sp* B5 was detected at significantly higher relative  
304 abundance in NPP NextSeq samples than MDA processed NextSeq samples,  
305 whereas *Exiguobacterium sibricum* was detected at significantly higher relative  
306 abundance in MDA NextSeq samples compared to NPP NextSeq samples (Figure  
307 6A). Genera that had significantly different relative abundances, depending on  
308 whether MinION or NextSeq sequencing approaches were used, were also  
309 identified. In this case a greater number of significantly different taxa was observed,  
310 with 24 genera out of a total of 46 being significantly different as a consequence of  
311 the sample processing or sequencing method used (Figure 6B, Supplemental Figure  
312 7). Six genera differed significantly between more than one pairwise group (Figure  
313 6B). *Pseudochrobactrum* was present at significantly different relative abundances  
314 across all 3 pairwise groups (i.e., MDA MinION and MDA NextSeq, MDA NextSeq  
315 and NPP NextSeq, and NPP NextSeq and Plate NextSeq). *Exiguobacterium* and  
316 *Planococcus* were present at significantly different relative abundances between



317 MDA MinION and MDA NextSeq as well as MDA NextSeq and NPP NextSeq. *Bacillus*,  
318 *Staphylococcus* and *Ochrobactrum* were present at significantly different relative  
319 abundances between MDA NextSeq and NPP NextSeq as well as NPP NextSeq and  
320 Plate NextSeq. The remaining 18 genera only differed across one pair of analyses  
321 (Figure 6B).

## 322 Discussion

323 16S rRNA rapid barcoding-based MinION sequencing of a simple mock community  
324 coupled with MEGAN classification by aligning with BLAST against a Silva database  
325 provided species level classification to 3 of the 4 species in a mock community and  
326 correctly identified both genera present. The rapid sequencing kit-based shotgun  
327 sequencing on the MinION platform coupled with LAST alignment against the NR  
328 database and MEGAN taxonomic classification resulted in correct classification of all  
329 four species but with low level false positive detection of *B. paralicheniformis*, a  
330 close relative of *B. licheniformis*. Thus, in this regard, MinION rapid WMGS  
331 performed better than MinION 16S sequencing for species level classification of  
332 related species, and could be further improved by reducing/eliminating false  
333 positives by exercising a stricter cut off and only focusing on species detected at  
334 high relative abundance.

335 Environmental DNA samples subject to MDA resulted in MinION sequencing reads  
336 that were shorter, with lower output than the high quality, high quantity, pooled  
337 mock metagenomic DNA generated. This is a particular issue for sequencing of low  
338 biomass environmental samples where, without the use of MDA, the quantities of  
339 DNA would not suffice for current rapid protocols, even after pooling of multiple  
340 swabs. The multiplexing of poorer quality DNA from environmental samples  
341 resulted in saturation of flow cells, resulting in lower output compared to the mock  
342 sequencing run. Despite this, MinION sequencing of environmental samples did  
343 perform well and was comparable to other methods when all factors were  
344 considered. Some of the most abundant species identified included *Kocuria* sp.

345 WRN011, *Enterococcus casseliflavus* and *Enterococcus faecium*. *Kocuria* sp.  
346 WRN011 is a saline alkaline soil isolate, and is perhaps selected for due to the  
347 unfavourable conditions within a food processing environment arising after  
348 cleaning in place (CIP). Both *Enterococcus faecium* and *Enterococcus casseliflavus*  
349 are common dairy microorganisms (Rivas *et al.*, 2012; Gelsomino *et al.*, 2002), with  
350 *Enterococcus* sp. been known to also be capable of growth at high pH and in the  
351 presence of NaCl (Khedid *et al.*, 2009).

352 However, caution is needed when interpreting the results, particularly from low  
353 biomass areas. There did appear to be some cross over between environmental  
354 sequences and negative controls particularly in environmental samples with low  
355 molecular loads. It must be considered that results for species classified in these  
356 samples could be false positives from cross over or contamination of sequences  
357 from other samples at any stage of swabbing, extraction, amplification or  
358 sequencing. As this occurrence was noted in both MinION and NextSeq generated  
359 sequences it is unlikely to be due to barcode misassignment or index swapping  
360 alone.

361 MAG analysis revealed 10 good quality genomes from combined MinION and MDA  
362 Illumina sequence reads. Seven of the 10 genomes originated from environmental  
363 swab samples, with the other 3 corresponding to positive controls. This form of  
364 analysis can, if carried out on a larger scale in the future and with greater  
365 sequencing depth, be used to bridge discrepancies in taxonomic classification.

366 There were also significant differences in the relative abundance of species due to  
367 the pre-processing and sequencing approaches taken. MinION sequencing indicated

368 greater relative abundances of *Enterococcus casseliflavus*, *Acinetobacter lwoffii* and  
369 *Acinteobacter johnsonii* than was suggested by MDA NextSeq sequencing. NextSeq  
370 MDA appeared to preferentially sequence *Kocuria sp.* WRN011 compared to  
371 MinION. *Pseudochrobactrum sp.* B5 abundances appeared lower in MDA (MinION  
372 and NextSeq) and easily culturable NextSeq plate samples than NPP samples. From  
373 a culture-based perspective, it is noted that this species is known to reduce  
374 hexavalent chromium (Ge, Dong and Zhou, 2013) and it may not grow well on the  
375 BHI agar used. *Exiguobacterium sibiricum* was detected in higher relative abundance  
376 in MDA amplified samples, with significantly higher relative abundance in MDA  
377 NextSeq samples compared to NPP NextSeq samples. This suggests it is  
378 preferentially amplified by multiple displacement amplification, leading to an  
379 overestimation of its relative abundance in these samples.

380 There were also significant differences in the relative abundances of genera that  
381 could not be assigned at the species level. This was most apparent when MDA  
382 NextSeq and NPP NextSeq outputs were compared. As well as plate sequences  
383 having lower levels of *Pseudochrobactrum*, they were also a lot less diverse than  
384 those generated through culture-independent approaches, suggesting culturing at  
385 the conditions used was less sensitive. Many species were seen in higher relative  
386 abundance in NextSeq plate samples than samples not subject to pre-culturing,  
387 including *Planococcus massiliensis*, *Microbacterium oxydans*, *Acinetobacter*  
388 *baumannii* and *Lysinibacillus sp.* B2A1, presumably as a consequence of being  
389 better suited to growth in these conditions.

390 Small, portable, real-time DNA sequencers provide the first steps towards real-time  
391 industry paced microbial classification and analysis, which could allow the  
392 implementation of process change to counteract microbial issues. Although DNA  
393 sequencing has been used sporadically for source tracking (Doyle *et al.*, 2017; Fretin  
394 *et al.*, 2018) and monitoring the microbiota through various seasons and  
395 environmental conditions (Li *et al.*, 2018), there are currently limited numbers of  
396 publications and datasets relating to food chain and processing facility  
397 microbiomes. While Oxford Nanopore sequencing accuracy is constantly improving  
398 (Watson and Warr, 2019), this in itself provides another hurdle to routine  
399 implementation in food processing environments, due to often lack of back  
400 compatibility with kits, hardware, software and analysis pipelines. More  
401 importantly, the need for high quality, high quantity DNA from swabs of an area  
402 that actively aims to have low bacterial loads is a challenge, further highlighting the  
403 need for adequate controls. Ideally, future forms of portable technologies can be  
404 implemented with a rapid kit, without a need for amplification. Despite these  
405 challenges, this study and the data generated will aid further attempts to  
406 characterise the microbiotas across the food chain, leading to an acceleration  
407 towards routine implementation. This is particularly true regarding the generation  
408 of MAGs from MDA amplified DNA, resulting in good quality MAGs for 7  
409 environmental isolates, for which relatively few genomes are already available.  
410 Notably, in some cases it was difficult to assign some of these MAGs to an existing  
411 species, suggesting that the genomes isolated were from related, but previously  
412 unclassified species. While *Exiguobacterium sp.* and *Kocuria sp.* have previously  
413 been reported in food processing environments (Vishnivetskaya and Kathariou,

414 2005; Røder *et al.*, 2015), *Planococcus sp.*, although not well characterised with few  
415 genomes available, are regarded as halotolerant, water-associated microorganisms,  
416 rather than food processing contaminants (Waghmode *et al.*, 2019). The generation  
417 of this MAG and further generation of MAGs, will accelerate the identification of  
418 food chain microbes through sequencing-based approaches in the future.

419 Ultimately, while this study highlights issues relating to sourcing sufficient template  
420 DNA, inconsistencies across sequencing approaches and platforms, and challenges  
421 with assigning taxa, the considerably great potential merits of applying  
422 metagenomic approaches to monitor the microbiology of the food chain are clear.

423 **Materials and methods**

424 **Mock community**

425 DNA from 4 target strains, *Bacillus cereus* DSM 31/ATCC 14579, *Bacillus*  
426 *thuringiensis* DSM 2046/ATCC 10792, *Bacillus licheniformis* DSM 13/ATCC 14580  
427 and *Geobacillus stearothermophilus* DSM 458 (Accession numbers  
428 GCF\_000007825.1, GCF\_002119445.1, GCF\_000011645.1 and GCF\_002300135.1,  
429 respectively), was combined to represent a 'mock' metagenomic sample of spore-  
430 forming bacteria. Genomic DNA was purchased (latter two strains, DSMZ) or  
431 extracted from in-house stocks (former two strains). Where necessary, DNA  
432 extraction was performed using the GenElute Bacterial Genomic DNA extraction kit  
433 (Sigma Aldrich, NA2110) according to manufacturer's instructions for Gram positive  
434 bacteria DNA extraction except that DNA was eluted in 75 µl elution solution. DNA  
435 concentrations were determined using the Qubit double-stranded DNA (dsDNA)  
436 high sensitivity (HS) assay kit (BioSciences) and ran on 1% agarose gel to check  
437 quality. DNA was diluted to 24 pM and pooled equimolar. 16S rRNA metagenome  
438 sequencing, using the 16S rapid barcoding kit SQK-RAB204, as well as rapid whole  
439 metagenome sequencing (WMGS), using the rapid sequencing kit SQK-RAD004, was  
440 performed using the Oxford Nanopore MinION sequencer. These kits required 10  
441 ng and 400 ng of DNA input, respectively. More specifically, the SQK-RAB204 16S  
442 rapid barcoding kit was used for library preparation according to manufacturer's  
443 instructions with barcode 01. DNA was sequenced on FloMIN 106 R9 version  
444 flowcell mk1 with minKNOW version 1.7.14 according to manufacturer's  
445 instructions. The SQK-RAD004 rapid sequencing kit was used to prepare the DNA

446 according to manufacturer's instructions, DNA was sequenced on FloMIN 106 R9  
447 version flowcell mk1 with MinKNOW version 1.11.5 according to manufacturer's  
448 instructions.

#### 449 **Bioinformatic analysis of mock community metagenomic DNA**

450 Genome sequences for the 4 strains represented in the mock metagenomic  
451 community were downloaded from NCBI RefSeq and aligned in a pairwise manner  
452 using the Artemis comparison tool (ACT) (Carver *et al.*, 2005) (Supplemental Figure  
453 1). 16S DNA sequences were rebasecalled using Albacore (version 2.2.6). FastQC  
454 was used to check sequence length and quality. IDBA fq2fa was used to convert  
455 fastq files to fasta format. BLASTn alignment (Altschul *et al.*, 1990) of sequences  
456 against 16S Silva database (release 132) (Pruesse *et al.*, 2007; Quast *et al.*, 2012)  
457 was performed with taxonomic classification by MEGAN (version 6.12.3) (Huson *et*  
458 *al.*, 2007). Genus and species levels of classification were determined, and relative  
459 abundances calculated and plotted using R ggplot2 (Wickham, 2009). Following  
460 basecalling with Albacore, Porechop (version 0.2.4) was used to remove adaptors  
461 from rapid WMGS reads before FastQC was used to check sequence length and  
462 quality and IDBA fq2fa was used to convert fastq format to fasta format (Peng *et al.*,  
463 2012). LAST alignment of reads (Kielbasa *et al.*, 2011; Sheetlin *et al.*, 2014) was  
464 performed against the NR database (March 2018) (Pruitt, Tatusova and Maglott,  
465 2005; Pruitt *et al.*, 2012) with MEGAN long read (LR) (MEGAN version 6.12.3)  
466 (Huson *et al.*, 2018) taxonomic classification. Ranks were split, relative abundances  
467 calculated and plotted using R ggplot2 (Wickham, 2009).



468 The assembly of contigs from metagenomic reads was performed using Canu  
469 version 1.7 (Koren *et al.*, 2017) with -nanopore-raw flag. MUMmer alignment was  
470 performed on the assembled contigs against the 4 known species genomes from  
471 RefSeq, with dnadiff used to highlight differences between assemblies and  
472 reference genomes (Kurtz *et al.*, 2004; Delcher *et al.*, 2002). The resulting  
473 comparisons were visualised using R ggbio and GenomicRanges (Yin, Cook and  
474 Lawrence, 2012; Lawrence *et al.*, 2013).

#### 475 **Environmental sample collection and processing**

476 Environmental swabbing was performed in a commercial dairy processing pilot  
477 plant. Eight locations were swabbed during the course of a single day, after cleaning  
478 in place (CIP) had been completed and before the next round of dairy processing  
479 (Figure 2). These eight locations included a table, door, wall, gaskets/flow plate  
480 seals, external surface of dryer balance tank, internal surface of dryer balance tank,  
481 external surface of evaporator, and drain beside evaporator. Overall, these eight  
482 locations were swabbed over three different months (October, November,  
483 December), at a frequency of once per month. Swabbing was performed using  
484 Technical Service Consultants Ltd. sponges in neutralising buffer (Sparks Lab  
485 Supplies, SWA2023). 5 swabs were performed per surface. Swabbing was  
486 performed according to manufacturer's instructions (Supplemental Methods 1.1).  
487 In the laboratory, 5 sponges for each area were pooled aseptically into the  
488 stomacher bag of one. Each bag of 5 sponges was subjected to stomaching at 260  
489 rpm for 1 minute. The liquid was then removed, yielding 21 ml for each sample of 5  
490 sponges. 20 ml was prepared for DNA extraction. 1 ml was used for culturing. Two x

491 15 ml falcon tubes for each sample holding a total of 20 ml were centrifuged at  
492 4,500 x g for 20 min at 4°C. The supernatant was discarded, and pellet resuspended  
493 in 500 µl UV treated, autoclaved phosphate buffered saline (PBS). The two  
494 resuspended pellets for each area were pooled into a 2 ml microfuge tube. This  
495 tube was centrifuged at 13,000 x g for 2 min and the supernatant was discarded.  
496 The pellet was stored at -80°C for up to 1 month before DNA extraction. Swab  
497 negative controls were also processed in the same way for each sampling day.  
498 Briefly, 5 swabs were pooled, subjected to stomaching, liquid collected, 1 ml split  
499 for culturing, 20 ml pelleted, washed and frozen.

#### 500 **Culture analysis**

501 Of the 1 ml of liquid recovered from each stomacher bag, 100 µl was plated on BHI  
502 agar in triplicate. Another 100 µl was used for serial tenfold dilution and spread  
503 plate on BHI agar in triplicate. All agar plates incubated at 30°C for 48 h. 600 µl of  
504 liquid was subjected to spore pasteurisation by heating to 80°C for 12 min in a  
505 heating block. This heat treated liquid was then spread plated on BHI in triplicate  
506 for incubation at both 30°C and 55°C for 48 h, after which time colonies were  
507 counted to determine colony forming units (CFU).

508 For each sample, the colonies from one agar plate, onto which the neat stomacher  
509 bag liquid had been plated, were removed by washing and pelleted to facilitate  
510 DNA extraction to represent metagenomic DNA from easy to culture environmental  
511 microorganisms. To this end, 5 ml PBS was added to the agar plate, and swirled  
512 around, before colonies were scraped off with a sterile Lazy-L spreader (Sigma-  
513 Aldrich) and 4 ml recovered into a sterile 15 ml falcon tube. This was centrifuged at

514 4,500 x g for 20 min at 4°C before removing supernatant. The resulting pellet was  
515 resuspended in 1 ml PBS and transferred to a 2 ml microfuge tube. The tube was  
516 centrifuged at 13,000 x g for 2 min at room temperature and supernatant removed.  
517 The pellet was stored at -80°C for up to three months before DNA extraction. From  
518 other agar plates, isolated colonies with obviously different morphologies from  
519 each sample were picked, restreaked for purity, inoculated in BHI broth and  
520 stocked at -20°C in a final concentration of 25% glycerol.

### 521 **DNA extraction and MDA amplification**

522 The Qiagen PowerSoil Pro kit was used for DNA extractions from both  
523 environmental sample pellets, and easily culturable washed plate pellets. Easily  
524 culturable pellets were removed from -80°C storage and resuspended in 1 ml PBS.  
525 200 µl (or 500 µl for 9 smaller pellets, corresponding door, external evaporator and  
526 internal dryer balance tank samples for all 3 months) was removed and centrifuged  
527 at 12,000 x g for 2 min. The supernatant was discarded and the pellet retained.  
528 These pellets, and those sourced directly from environmental swabbing, i.e.  
529 without culture, were resuspended in 800 µl CD1 and transferred to a Powerbead  
530 Pro tube. Powerbead Pro tubes were secured in a tissue lyser set at 20 Hz for 10  
531 min before centrifuging and following the rest of the PowerSoil Pro kit  
532 manufacturer's instructions, eluting in a smaller volume, of 35 µl. For each sampling  
533 day, negative controls, involving unused swabs, were also prepared by following an  
534 identical extraction protocol and additional negative controls, to detect kit  
535 contaminants, were generated whereby an extraction was performed using the kit  
536 reagents alone, starting with 800 µL solution CD1.

537 Whole metagenome amplification was performed using multiple displacement  
538 amplification (MDA) with the REPLI-g Single Cell kit (Qiagen, 150345). MDA was  
539 performed using DNA from environmental samples and controls for each day. These  
540 controls consisted of swab negative control, DNA extraction kit negative control,  
541 blank MDA preparation as a MDA negative control and mock metagenomic  
542 community (section 1.6.1) as a positive control. DNA concentrations were  
543 determined using Qubit dsDNA HS kit. Samples with high DNA concentrations were  
544 diluted such that all samples had a final concentration of < 10 ng in 2.5  $\mu$ l. MDA  
545 amplification was performed according to manufacturer's instructions  
546 (Supplemental Methods 1.2) for 12 sample amplifications at a time (8  
547 environmental samples, 1 positive control, 3 negative controls (swab, extraction,  
548 MDA)). Amplified DNA was then stored at -20°C.

#### 549 **Library preparation and sequencing**

##### 550 **MinION library**

551 DNA concentrations of 36 MDA samples were measured using both the Qubit  
552 dsDNA broad range (BR) and HS assays and diluted to 400 ng in 7.5  $\mu$ l. Three  
553 libraries were prepared, containing 12 samples each (8 environmental MDA  
554 samples, 3 MDA negative controls (swab, extraction and MDA kit negative controls)  
555 and a MDA mock community positive control) per flow cell. The SQK-RBK004 rapid  
556 barcoding kit was used to prepare the DNA according to manufacturer's  
557 instructions, including an optional Ampure XP clean up step, directly prior to  
558 sequencing. DNA was sequenced on FloMIN 106 R9 version flowcell mk1 with  
559 MinKNOW version 18.12.4 according to manufacturer's instructions.

560 **Illumina Nextera library**

561 The DNA concentrations of MDA (n = 36), non-MDA (i.e., metagenomic DNA not  
562 subjected to pre-processing (NPP)) (n = 33), and easily culturable (Plate) (n = 24)  
563 metagenomic DNA samples was measured using the Qubit HS dsDNA kit and  
564 diluted. DNA was prepared for Illumina sequencing following Illumina Nextera XT  
565 Library Preparation Kit guidelines except that tagmentation was performed for 7  
566 min. DNA tagmentation was visualised using Agilent Bioanalyzer high sensitivity  
567 DNA analysis, and average fragment size calculated. The DNA concentration was  
568 measured by Qubit HS dsDNA assay and the concentration then calculated, before  
569 diluting and pooling at equimolar ratios. The DNA library was sequenced on  
570 Illumina NextSeq at the Teagasc DNA sequencing facility, with a NextSeq (500/500)  
571 High Output 300 cycles v2.5 kit (Illumina 20024908).

572 **16S rDNA Sanger sequencing of isolated colonies**

573 16S colony PCR was performed (Supplemental Methods 1.3) using universal primers  
574 27F and 338R for 16S gene (AGAGTTTGATCCTGGCTCAG and  
575 CATGCTGCCTCCGTAGGAGT, respectively). PCR products were run on a 1 %  
576 agarose gel, before cleaning with 1.8 x Ampure XP. 5 µl of each cleaned up PCR  
577 product was aliquoted into a 96 well plate and 5 µl of forward primer added on top  
578 at 5 µM according to GATC requirements. A unique barcode was added to each  
579 plate and sent to GATC Biotech (Germany) for Sanger sequencing. A subset of  
580 amplicons were also sequenced with the reverse primer to ensure accuracy.

581 **Bioinformatic analysis of environmental metagenomic DNA**

582 **Analysis of MinION data**

583 Guppy basecalled reads obtained from MinKnow (version 18.12.4) were  
584 demultiplexed using Guppy barcoder version (2.1.3) to produce a barcoding  
585 summary text file. This contained the percentage match of each read to their  
586 barcodes with a minimum score of 60, the default). All fastq files produced by  
587 MinKnow were concatenated and guppy\_bcsplit.py ([https://github.com/ms-  
588 gx/guppy\\_bcsplit](https://github.com/ms-gx/guppy_bcsplit)) allowed demultiplexing of reads based on their barcode assigned  
589 in the barcoding summary text file. Porechop (version 0.2.4) was used to remove  
590 adaptors from rapid kit sequence reads before Fastqc was used to check sequence  
591 length and quality. IDBA fq2fa was used to convert fastq to fasta (Peng *et al.*, 2012).  
592 LAST alignment of fasta files (Kielbasa *et al.*, 2011; Sheetlin *et al.*, 2014) against the  
593 NR database (March 2018) (Pruitt, Tatusova and Maglott, 2005; Pruitt *et al.*, 2012)  
594 was performed with the MEGAN LR classification (MEGAN version 6.12.3) (Huson *et*  
595 *al.*, 2018). Files were merged, ranks were split, total number of bases sequenced,  
596 and classified were calculated. Relative abundances calculated and plotted using R  
597 ggplot2 (Wickham, 2009).

598 **Analysis of NextSeq data**

599 BCL2fastq was used to convert raw sequence reads from Illumina NextSeq to fastq  
600 format. Kneaddata from bioBakery (McIver *et al.*, 2018) used trimmomatic for  
601 quality filtering and trimming paired end files (Bolger, Lohse and Usadel, 2014) with  
602 BMTagger to remove human and bovine reads. FastQC was used to visualise  
603 sequence length and quality. IDBA converted fastq to fasta (Peng *et al.*, 2012).

604 Diamond alignment (Buchfink, Xie and Huson, 2015) of fasta files was performed  
605 against the NR database (march 2018) (Pruitt, Tatusova and Maglott, 2005; Pruitt *et*  
606 *al.*, 2012) with MEGAN classification (MEGAN version 6.12.3 ) (Huson *et al.*, 2018).  
607 Files were merged, ranks were split, total number of bases sequenced and classified  
608 calculated and relative abundances calculated and plotted using R ggplot2  
609 (Wickham, 2009).

610 Illumina data was also analysed using Kraken2 and Bracken (Lu *et al.*, 2017; Wood  
611 and Salzberg, 2014) for taxonomy classification as well as using MetaPhlan2 (Truong  
612 *et al.*, 2015) for taxonomy classification for the purpose of comparison.

### 613 **Generation of MinION-Illumina hybrid Metagenome-assembled genomes**

614 MDA amplified sequences from both Illumina and Oxford Nanopore sequencing  
615 were assembled using OPERA-MS (Bertrand *et al.*, 2019). Illumina reads were then  
616 mapped against assemblies using bowtie2 (Langmead and Salzberg, 2012) and bam  
617 files sorted using samtools (Li *et al.*, 2009). Depth was calculated and Metabat2 ran  
618 on assembled contigs to produce bins (Kang *et al.*, 2015; Kang *et al.*, 2019). Checkm  
619 was used to determine the quality of the metagenome assembled genomes  
620 (MAGs). Prokka (Seemann, 2014) was used to generate .ffn files from bins, Kaiju  
621 (Menzel, Ng and Krogh, 2016)-based taxonomic classification was performed on the  
622 open reading frames from prokka. Megan LR (Huson *et al.*, 2018) was also used on  
623 the whole bins for taxonomic classification of high quality MAGs.

### 624 **Culture- and 16S rRNA Sanger sequence-based analysis**

625 CFUs were determined on the basis of an average of three agar plates per sample.  
626 CFU per swab was calculated by dividing by 5 (5 swabs=1 sample, and each swab

627 covered area 360cm<sup>2</sup>). 16S rRNA Sanger sequences resulting from morphologically  
628 different isolates per sample were blasted using BLASTn against the 16S ribosomal  
629 RNA (Bacteria and Archaea) database on NCBI, with top hits recorded, and genus  
630 level classification analysed.

### 631 **Statistics**

632 Pairwise Wilcoxon rank sums test using Benjamini Hochberg *p*-value correction  
633 analysis was used to compare sample groups, including investigations of the impact  
634 of sequencer type on taxonomy classification with MinION MDA-treated and  
635 NextSeq MDA-treated samples. The impact of MDA amplification was also  
636 investigated in this way through comparison between NextSeq MDA treated  
637 samples and NextSeq no pre-processing (NPP) samples. Differences in taxonomy  
638 classification between sequences derived from environmental metagenomic DNA  
639 versus those sourced from easy to culture microorganisms was shown by  
640 comparing NextSeq NPP and NextSeq easy to culture (plate) sequences. Diversity  
641 analysis was performed in R with vegan package. Shannon and Simpson alpha  
642 diversity metrics were calculated along with Bray Curtis Nonmetric  
643 Multidimensional Scaling beta diversity metrics. Pairwise Wilcoxon rank sums test  
644 using Benjamini Hochberg *p*-value correction was used to compared samples  
645 groups based on sequencing and processing methods used, controls were excluded  
646 from these calculations.

### 647 **Accession number**

648 Sequence data have been deposited in the European Nucleotide Archive (ENA)  
649 under the study accession number PRJEB39267.



650 **Acknowledgements**

651 This research was funded by the Department of Agriculture, Food and the Marine  
652 (DAFM), under the FIRM project SACCP, reference number 14/F/883. Research in  
653 the Cotter laboratory is also funded by Science Foundation Ireland (SFI) under grant  
654 numbers SFI/12/RC/2273 (APC Microbiome Ireland) and SFI/16/RC/3835 (Vistamilk)  
655 and by the European Commission under the Horizon 2020 program under grant  
656 number 818368 (Master).

657 **References**

- 658 Altschul, S., Gish, W., Miller, W., Myers, E. and Lipman, D. (1990) 'Basic local  
659 alignment search tool', *J Mol Biol*, 215. DOI: 10.1016/s0022-2836(05)80360-2
- 660 Bertrand, D., Shaw, J., Kalathiyappan, M., Ng, A. H. Q., Kumar, M. S., Li, C.,  
661 Dvornicic, M., Soldo, J. P., Koh, J. Y., Tong, C., Ng, O. T., Barkham, T., Young, B.,  
662 Marimuthu, K., Chng, K. R., Sikic, M. and Nagarajan, N. (2019) 'Hybrid metagenomic  
663 assembly enables high-resolution analysis of resistance determinants and mobile  
664 elements in human microbiomes', *Nat Biotechnol*, 37(8), pp. 937-944. DOI:  
665 10.1038/s41587-019-0191-2
- 666 Bolger, A. M., Lohse, M. and Usadel, B. (2014) 'Trimmomatic: a flexible trimmer for  
667 Illumina sequence data', *Bioinformatics (Oxford, England)*, 30(15), pp. 2114-2120.  
668 DOI: 10.1093/bioinformatics/btu170
- 669 Buchfink, B., Xie, C. and Huson, D. H. (2015) 'Fast and sensitive protein alignment  
670 using DIAMOND', *Nat Meth*, 12(1), pp. 59-60. DOI: 10.1038/nmeth.3176
- 671 Burgess, S. A., Lindsay, D. and Flint, S. H. (2010) 'Thermophilic bacilli and their  
672 importance in dairy processing', *Int J Food Microbiol*, 144(2), pp. 215-25. DOI:  
673 10.1016/j.ijfoodmicro.2010.09.027
- 674 Carver, T. J., Rutherford, K. M., Berriman, M., Rajandream, M.-A., Barrell, B. G. and  
675 Parkhill, J. (2005) 'ACT: the Artemis comparison tool', *Bioinformatics*, 21(16), pp.  
676 3422-3423. DOI: 10.1093/bioinformatics/bti553
- 677 Charalampous, T., Kay, G. L., Richardson, H., Aydin, A., Baldan, R., Jeanes, C., Rae,  
678 D., Grundy, S., Turner, D. J., Wain, J., Leggett, R. M., Livermore, D. M. and O'Grady,

679 J. (2019) 'Nanopore metagenomics enables rapid clinical diagnosis of bacterial  
680 lower respiratory infection', *Nat Biotechnol*. DOI: 10.1038/s41587-019-0156-5

681 Cho, T. J., Kim, H. W., Kim, N. H., Park, S. M., Kwon, J. I., Kim, Y. J., Lee, K. W. and  
682 Rhee, M. S. (2018) 'New insights into the thermophilic spore-formers in powdered  
683 infant formula: Implications of changes in microbial composition during  
684 manufacture', *Food Control*, 92, pp. 464-470. DOI: 10.1016/j.foodcont.2018.05.036

685 Delcher, A. L., Phillippy, A., Carlton, J. and Salzberg, S. L. (2002) 'Fast algorithms for  
686 large-scale genome alignment and comparison', *Nucleic acids research*, 30(11), pp.  
687 2478-2483. DOI: 10.1093/nar/30.11.2478

688 Doyle, C. J., Gleeson, D., Jordan, K., Beresford, T. P., Ross, R. P., Fitzgerald, G. F. and  
689 Cotter, P. D. (2015) 'Anaerobic sporeformers and their significance with respect to  
690 milk and dairy products', *Int J Food Microbiol*, 197, pp. 77-87. DOI:  
691 10.1016/j.ijfoodmicro.2014.12.022

692 Doyle, C. J., Gleeson, D., O'Toole, P. W. and Cotter, P. D. (2017) 'Impacts of seasonal  
693 housing and teat preparation on raw milk microbiota: a high-throughput  
694 sequencing study', *Appl Environ Microbiol*, 83(2). DOI: 10.1128/AEM.02694-16

695 Doyle, C. J., O'Toole, P. W. and Cotter, P. D. (2018) 'Genomic Characterization of  
696 Sulphite Reducing Bacteria Isolated From the Dairy Production Chain', *Frontiers in*  
697 *Microbiology*, 9. DOI: 10.3389/fmicb.2018.01507

698 Faille, C., Benezech, T., Midelet-Bourdin, G., Lequette, Y., Clarisse, M., Ronse, G.,  
699 Ronse, A. and Slomianny, C. (2014) 'Sporulation of *Bacillus* spp. within biofilms: a  
700 potential source of contamination in food processing environments', *Food*  
701 *Microbiol*, 40, pp. 64-74. DOI: 10.1016/j.fm.2013.12.004

702 Fretin, M., Martin, B., Rifa, E., Isabelle, V. M., Pomies, D., Ferlay, A., Montel, M. C.  
703 and Delbes, C. (2018) 'Bacterial community assembly from cow teat skin to ripened  
704 cheeses is influenced by grazing systems', *Sci Rep*, 8(1), pp. 200. DOI:  
705 10.1038/s41598-017-18447-y

706 Fysun, O., Kern, H., Wilke, B. and Langowski, H.-C. (2019) 'Evaluation of factors  
707 influencing dairy biofilm formation in filling hoses of food-processing equipment',  
708 *Food and Bioproducts Processing*, 113, pp. 39-48. DOI: 10.1016/j.fbp.2018.10.009

709 Ge, S., Dong, X. and Zhou, J. (2013) 'Comparative evaluations on bio-treatment of  
710 hexavalent chromate by resting cells of *Pseudochrobactrum* sp. and *Proteus* sp. in  
711 wastewater', *J Environ Manage*, 126, pp. 7-12. DOI: 10.1016/j.jenvman.2013.04.011

712 Gelsomino, R., Vancanneyt, M., Cogan, T. M., Condon, S. and Swings, J. (2002)  
713 'Source of Enterococci in a Farmhouse Raw-Milk Cheese', *Applied and*  
714 *Environmental Microbiology*, 68(7), pp. 3560. DOI: 10.1128/aem.68.7.3560-  
715 3565.2002

716 Gleeson, D., O'Connell, A. and Jordan, K. (2013) 'Review of potential sources and  
717 control of thermophilic bacteria in bulk-tank milk', *Irish Journal of Agricultural and*  
718 *Food Research*, 52(2), pp. 217-227.

719 Huson, D., Auch, A., Qi, J. and Schuster, S. (2007) 'MEGAN analysis of metagenomic  
720 data', *Genome Res*, 17. DOI: 10.1101/gr.5969107

721 Huson, D. H., Albrecht, B., Bagci, C., Bessarab, I., Gorska, A., Jolic, D. and Williams, R.  
722 B. H. (2018) 'MEGAN-LR: new algorithms allow accurate binning and easy  
723 interactive exploration of metagenomic long reads and contigs', *Biol Direct*, 13(1),  
724 pp. 6. DOI: 10.1186/s13062-018-0208-7

- 725 Kafetzopoulou, L. E., Efthymiadis, K., Lewandowski, K., Crook, A., Carter, D.,  
726 Osborne, J., Aarons, E., Hewson, R., Hiscox, J. A., Carroll, M. W., Vipond, R. and  
727 Pullan, S. T. (2018) 'Assessment of metagenomic Nanopore and Illumina sequencing  
728 for recovering whole genome sequences of chikungunya and dengue viruses  
729 directly from clinical samples', *Euro Surveill*, 23(50). DOI: 10.2807/1560-  
730 7917.es.2018.23.50.1800228
- 731 Kang, D. D., Froula, J., Egan, R. and Wang, Z. (2015) 'MetaBAT, an efficient tool for  
732 accurately reconstructing single genomes from complex microbial communities',  
733 *PeerJ*, 3, pp. e1165. DOI: 10.7717/peerj.1165
- 734 Kang, D. D., Li, F., Kirton, E., Thomas, A., Egan, R., An, H. and Wang, Z. (2019)  
735 'MetaBAT 2: an adaptive binning algorithm for robust and efficient genome  
736 reconstruction from metagenome assemblies', *PeerJ*, 7, pp. e7359-e7359. DOI:  
737 10.7717/peerj.7359
- 738 Khedid, K., Faid, M., Mokhtari, A., Soulaymani, A. and Zinedine, A. (2009)  
739 'Characterization of lactic acid bacteria isolated from the one humped camel milk  
740 produced in Morocco', *Microbiological Research*, 164(1), pp. 81-91. DOI:  
741 10.1016/j.micres.2006.10.008
- 742 Kielbasa, S. M., Wan, R., Sato, K., Horton, P. and Frith, M. C. (2011) 'Adaptive seeds  
743 tame genomic sequence comparison', *Genome Res*, 21(3), pp. 487-93. DOI:  
744 10.1101/gr.113985.110
- 745 Koren, S., Walenz, B. P., Berlin, K., Miller, J. R., Bergman, N. H. and Phillippy, A. M.  
746 (2017) 'Canu: scalable and accurate long-read assembly via adaptive k-mer

747 weighting and repeat separation', *Genome Res*, 27(5), pp. 722-736. DOI:  
748 10.1101/gr.215087.116

749 Kurtz, S., Phillippy, A., Delcher, A. L., Smoot, M., Shumway, M., Antonescu, C. and  
750 Salzberg, S. L. (2004) 'Versatile and open software for comparing large genomes',  
751 *Genome biology*, 5(2), pp. R12-R12. DOI: 10.1186/gb-2004-5-2-r12

752 Langmead, B. and Salzberg, S. L. (2012) 'Fast gapped-read alignment with Bowtie 2',  
753 *Nat Meth*, 9(4), pp. 357-359. DOI: 10.1038/nmeth.1923

754 Lawrence, M., Huber, W., Pagès, H., Aboyoun, P., Carlson, M., Gentleman, R.,  
755 Morgan, M. T. and Carey, V. J. (2013) 'Software for Computing and Annotating  
756 Genomic Ranges', *PLOS Computational Biology*, 9(8), pp. e1003118. DOI:  
757 10.1371/journal.pcbi.1003118

758 Li, H., Handsaker, B., Wysoker, A., Fennell, T., Ruan, J., Homer, N., Marth, G.,  
759 Abecasis, G., Durbin, R. and Genome Project Data Processing, S. (2009) 'The  
760 Sequence Alignment/Map format and SAMtools', *Bioinformatics*, 25(16), pp. 2078-  
761 9. DOI: 10.1093/bioinformatics/btp352

762 Li, N., Wang, Y., You, C., Ren, J., Chen, W., Zheng, H. and Liu, Z. (2018) 'Variation in  
763 Raw Milk Microbiota Throughout 12 Months and the Impact of Weather  
764 Conditions', *Sci Rep*, 8(1), pp. 2371. DOI: 10.1038/s41598-018-20862-8

765 Lu, J., Breitwieser, F. P., Thielen, P. and Salzberg, S. L. (2017) 'Bracken: estimating  
766 species abundance in metagenomics data', *PeerJ Computer Science*, 3, pp. e104.  
767 DOI: 10.7717/peerj-cs.104

- 768 McHugh, A. J., Feehily, C., Tobin, J. T., Fenelon, M. A., Hill, C. and Cotter, P. D. (2018)  
769 'Mesophilic Sporeformers Identified in Whey Powder by Using Shotgun  
770 Metagenomic Sequencing', *Appl Environ Microbiol*, 84(20). DOI:  
771 10.1128/AEM.01305-18
- 772 McHugh, A. J., Feehily, C., Fenelon, M. A., Gleeson, D., Hill, C. and Cotter, P. D.  
773 (2020) 'Tracking the Dairy Microbiota from Farm Bulk Tank to Skimmed Milk  
774 Powder', *mSystems*, 5(2). DOI: 10.1128/mSystems.00226-20
- 775 McIver, L. J., Abu-Ali, G., Franzosa, E. A., Schwager, R., Morgan, X. C., Waldron, L.,  
776 Segata, N. and Huttenhower, C. (2018) 'bioBakery: a meta'omic analysis  
777 environment', *Bioinformatics (Oxford, England)*, 34(7), pp. 1235-1237. DOI:  
778 10.1093/bioinformatics/btx754
- 779 Menzel, P., Ng, K. L. and Krogh, A. (2016) 'Fast and sensitive taxonomic classification  
780 for metagenomics with Kaiju', *Nat Commun*, 7, pp. 11257. DOI:  
781 10.1038/ncomms11257
- 782 Peng, Y., Leung, H. C. M., Yiu, S. M. and Chin, F. Y. L. (2012) 'IDBA-UD: a de novo  
783 assembler for single-cell and metagenomic sequencing data with highly uneven  
784 depth', *Bioinformatics*, 28(11), pp. 1420-1428. DOI: 10.1093/bioinformatics/bts174
- 785 Pruesse, E., Quast, C., Knittel, K., Fuchs, B. M., Ludwig, W., Peplies, J. and Glöckner,  
786 F. O. (2007) 'SILVA: a comprehensive online resource for quality checked and  
787 aligned ribosomal RNA sequence data compatible with ARB', *Nucleic Acids  
788 Research*, 35(21), pp. 7188-7196. DOI: 10.1093/nar/gkm864

- 789 Pruitt, K. D., Tatusova, T., Brown, G. R. and Maglott, D. R. (2012) 'NCBI Reference  
790 Sequences (RefSeq): current status, new features and genome annotation policy',  
791 *Nucleic Acids Res*, 40.
- 792 Pruitt, K. D., Tatusova, T. and Maglott, D. R. (2005) 'NCBI Reference Sequence  
793 (RefSeq): a curated non-redundant sequence database of genomes, transcripts and  
794 proteins', *Nucleic acids research*, 33(Database issue), pp. D501-D504. DOI:  
795 10.1093/nar/gki025
- 796 Quast, C., Pruesse, E., Yilmaz, P., Gerken, J., Schweer, T., Yarza, P., Peplies, J. and  
797 Glöckner, F. O. (2012) 'The SILVA ribosomal RNA gene database project: improved  
798 data processing and web-based tools', *Nucleic Acids Research*, 41(D1), pp. D590-  
799 D596. DOI: 10.1093/nar/gks1219
- 800 Quick, J., Grubaugh, N. D., Pullan, S. T., Claro, I. M., Smith, A. D., Gangavarapu, K.,  
801 Oliveira, G., Robles-Sikisaka, R., Rogers, T. F., Beutler, N. A., Burton, D. R., Lewis-  
802 Ximenez, L. L., de Jesus, J. G., Giovanetti, M., Hill, S. C., Black, A., Bedford, T., Carroll,  
803 M. W., Nunes, M., Alcantara Jr, L. C., Sabino, E. C., Baylis, S. A., Faria, N. R., Loose,  
804 M., Simpson, J. T., Pybus, O. G., Andersen, K. G. and Loman, N. J. (2017) 'Multiplex  
805 PCR method for MinION and Illumina sequencing of Zika and other virus genomes  
806 directly from clinical samples', *Nature Protocols*, 12, pp. 1261. DOI:  
807 10.1038/nprot.2017.066
- 808 Rivas, F. P., Castro, M. P., Vallejo, M., Marguet, E. and Campos, C. A. (2012)  
809 'Antibacterial potential of *Enterococcus faecium* strains isolated from ewes' milk  
810 and cheese', *LWT - Food Science and Technology*, 46(2), pp. 428-436. DOI:  
811 10.1016/j.lwt.2011.12.005



812 Røder, H. L., Raghupathi, P. K., Herschend, J., Brejnrod, A., Knøchel, S., Sørensen, S.  
813 J. and Burmølle, M. (2015) 'Interspecies interactions result in enhanced biofilm  
814 formation by co-cultures of bacteria isolated from a food processing environment',  
815 *Food Microbiology*, 51, pp. 18-24. DOI: 10.1016/j.fm.2015.04.008

816 Sadiq, F. A., Li, Y., Liu, T., Flint, S., Zhang, G., Yuan, L., Pei, Z. and He, G. (2016) 'The  
817 heat resistance and spoilage potential of aerobic mesophilic and thermophilic spore  
818 forming bacteria isolated from Chinese milk powders', *Int J Food Microbiol*, 238, pp.  
819 193-201. DOI: 10.1016/j.ijfoodmicro.2016.09.009

820 Sanderson, N. D., Street, T. L., Foster, D., Swann, J., Atkins, B. L., Brent, A. J.,  
821 McNally, M. A., Oakley, S., Taylor, A., Peto, T. E. A., Crook, D. W. and Eyre, D. W.  
822 (2018) 'Real-time analysis of nanopore-based metagenomic sequencing from  
823 infected orthopaedic devices', *BMC Genomics*, 19(1), pp. 714. DOI: 10.1186/s12864-  
824 018-5094-y

825 Seemann, T. (2014) 'Prokka: rapid prokaryotic genome annotation', *Bioinformatics*,  
826 30(14), pp. 2068-9. DOI: 10.1093/bioinformatics/btu153

827 Sheetlin, S. L., Park, Y., Frith, M. C. and Spouge, J. L. (2014) 'Frameshift alignment:  
828 statistics and post-genomic applications', *Bioinformatics (Oxford, England)*, 30(24),  
829 pp. 3575-3582. DOI: 10.1093/bioinformatics/btu576

830 Tallent, S. M., Kotewicz, K. M., Strain, E. A. and Bennett, R. W. (2012) 'Efficient  
831 isolation and identification of *Bacillus cereus* group', *J AOAC Int*, 95(2), pp. 446-51.  
832 DOI: 10.5740/jaoacint.11-251

- 833 Truong, D. T., Franzosa, E. A., Tickle, T. L., Scholz, M., Weingart, G., Pasolli, E., Tett,  
834 A., Huttenhower, C. and Segata, N. (2015) 'MetaPhlan2 for enhanced metagenomic  
835 taxonomic profiling', *Nat Meth*, 12(10), pp. 902-903. DOI: 10.1038/nmeth.3589
- 836 Vishnivetskaya, T. A. and Kathariou, S. (2005) 'Putative transposases conserved in  
837 *Exiguobacterium* isolates from ancient Siberian permafrost and from contemporary  
838 surface habitats', *Applied and environmental microbiology*, 71(11), pp. 6954-6962.  
839 DOI: 10.1128/aem.71.11.6954-6962.2005
- 840 Waghmode, S., Suryavanshi, M., Dama, L., Kansara, S., Ghattargi, V., Das, P.,  
841 Banpurkar, A. and Satpute, S. K. (2019) 'Genomic Insights of Halophilic *Planococcus*  
842 *maritimus* SAMP MCC 3013 and Detail Investigation of Its Biosurfactant Production',  
843 *Frontiers in microbiology*, 10, pp. 235-235. DOI: 10.3389/fmicb.2019.00235
- 844 Wang, B., Tan, X., Du, R., Zhao, F., Zhang, L., Han, Y. and Zhou, Z. (2019) 'Bacterial  
845 composition of biofilms formed on dairy-processing equipment', *Preparative*  
846 *Biochemistry and Biotechnology*, 49(5), pp. 477-484. DOI:  
847 10.1080/10826068.2019.1587623
- 848 Watson, M. and Warr, A. (2019) 'Errors in long-read assemblies can critically affect  
849 protein prediction', *Nature Biotechnology*, 37(2), pp. 124-126. DOI:  
850 10.1038/s41587-018-0004-z
- 851 Wickham, H. (2009) *ggplot2: Elegant Graphics for Data Analysis*. Springer Publishing  
852 Company, Incorporated. DOI: 10.1007/978-0-387-98141-3
- 853 Wood, D. E. and Salzberg, S. L. (2014) 'Kraken: ultrafast metagenomic sequence  
854 classification using exact alignments', *Genome Biology*, 15(3), pp. R46. DOI:  
855 10.1186/gb-2014-15-3-r46

856 Yin, T., Cook, D. and Lawrence, M. (2012) 'ggbio: an R package for extending the  
857 grammar of graphics for genomic data', *Genome Biology*, 13(8), pp. R77. DOI:  
858 10.1186/gb-2012-13-8-r77

859

860 **Figures**

861

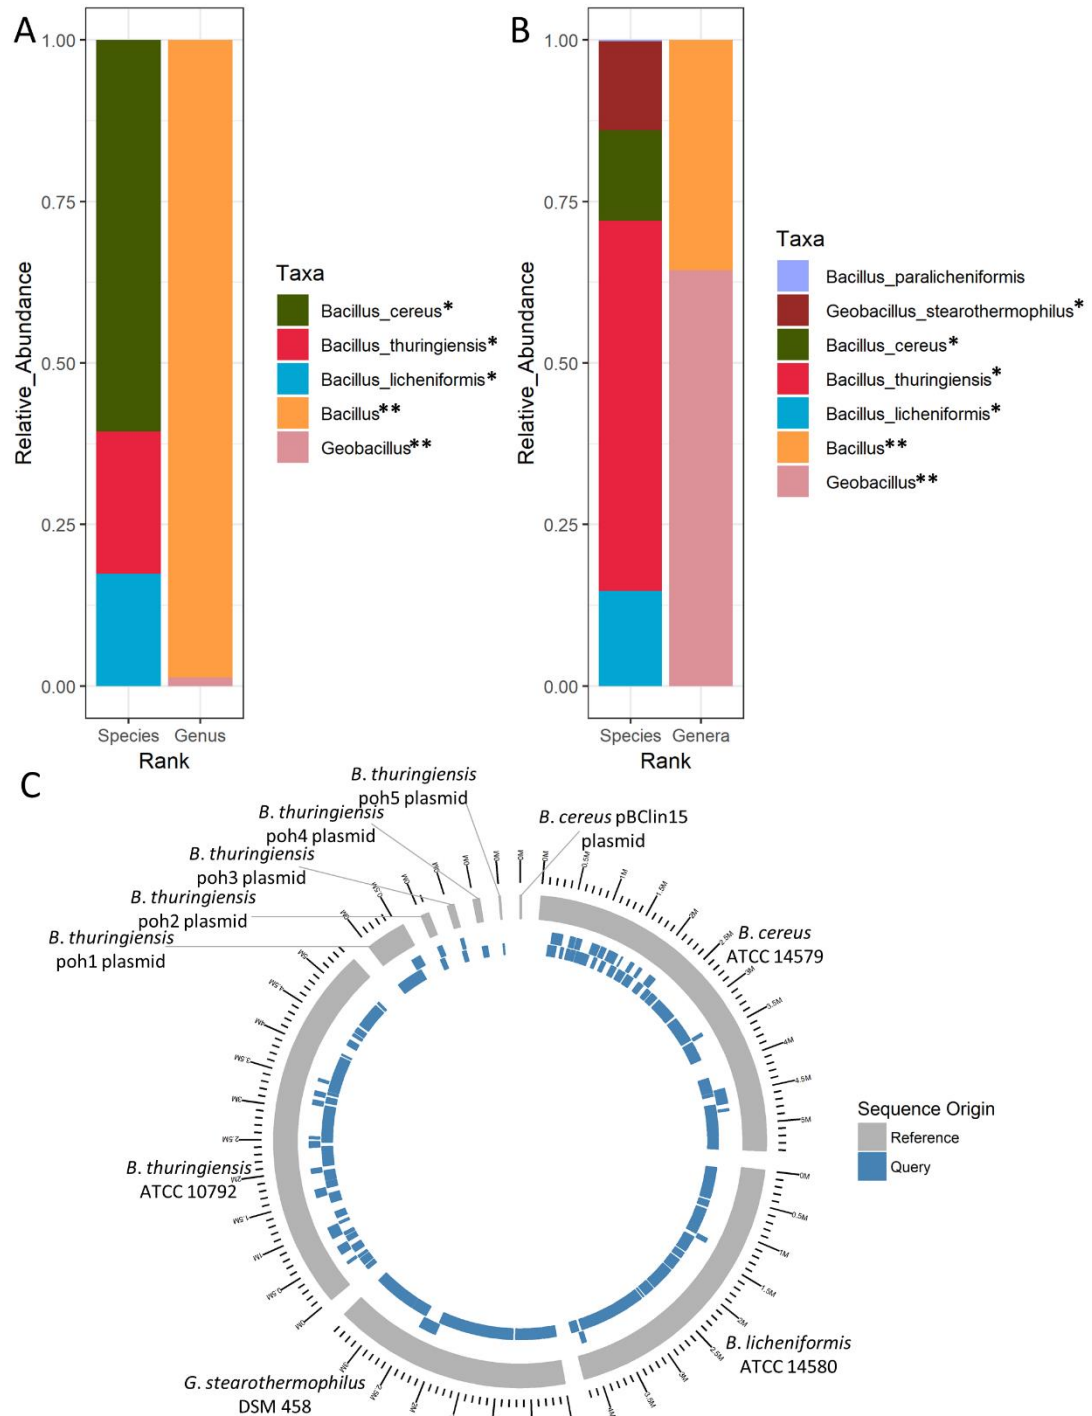

862

863 Figure 1. Mock community analysis.

864 MinION sequencing followed by MEGAN taxonomic classification of a simple mock  
865 community. A. Taxonomic classification following 16S sequencing. Expected species  
866 are denoted with \*, while expected genera are denoted \*\*. B. Taxonomic  
867 classification following rapid WMGS. Expected species are denoted with \*, while  
868 expected genera are denoted \*\*. C. *De novo* assembly of genomes by the canu  
869 assembler, followed by mapping back to original known genomes, to illustrate  
870 coverage at 97% identity. 4 genomes, with 6 plasmids illustrated, of which 4  
871 genomes and 5 plasmids had sequences aligned at 97% identity.

872

873

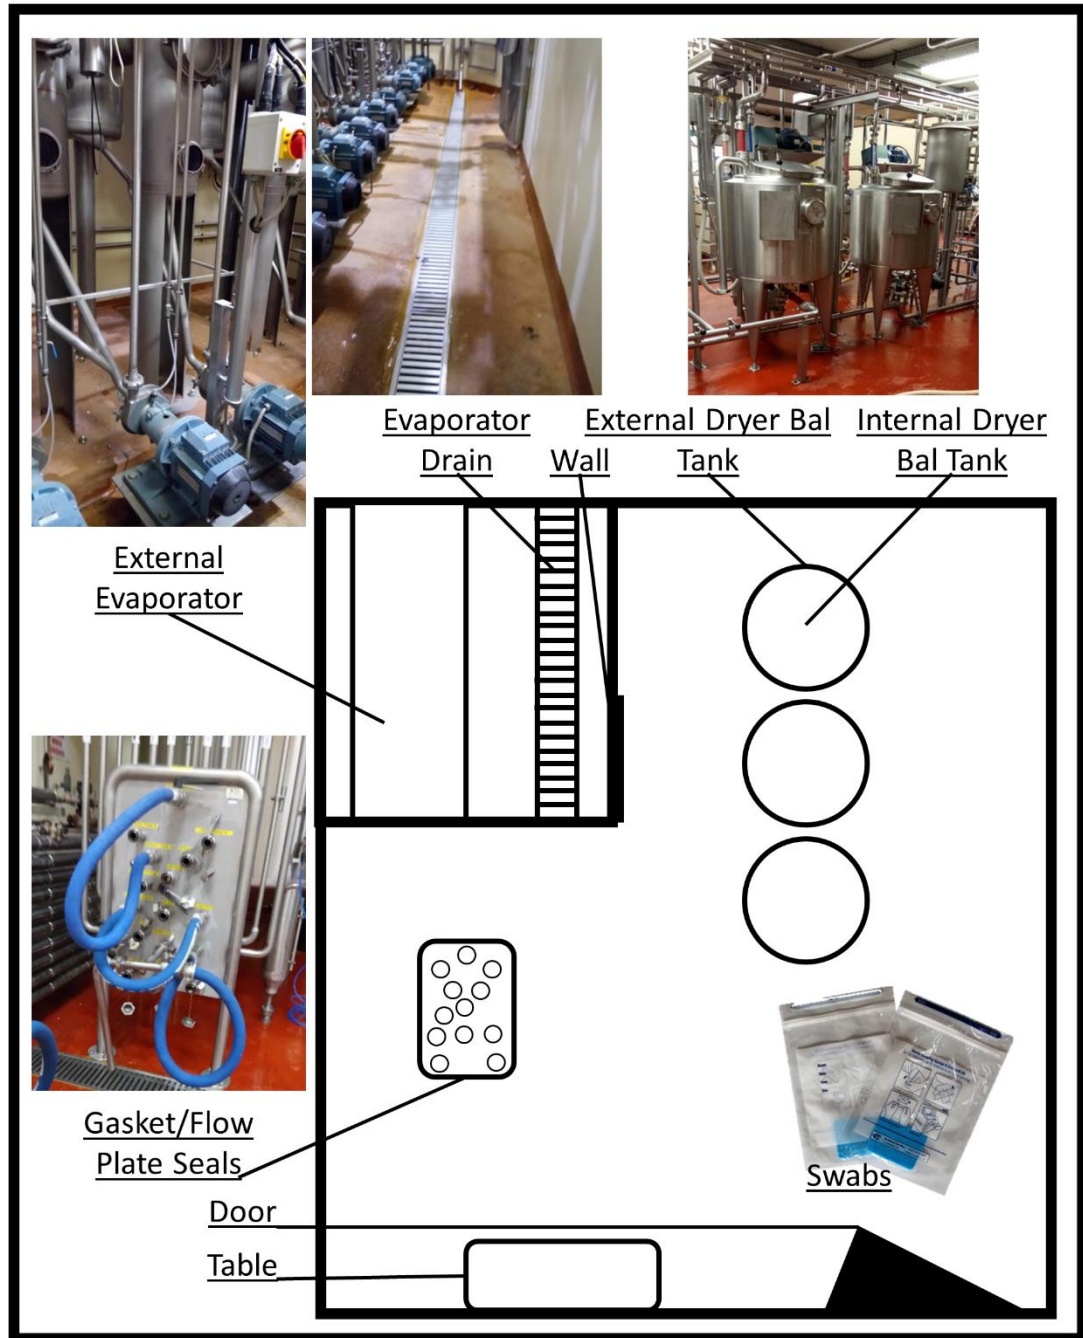

874

875 Figure 2. Schematic of dairy processing facility sampling areas.

876 Dairy processing facility schematic includes the 8 areas sampled in each of October,  
877 November, and December 2018. Areas were sampled post CIP and prior to the  
878 recommencement of processing.

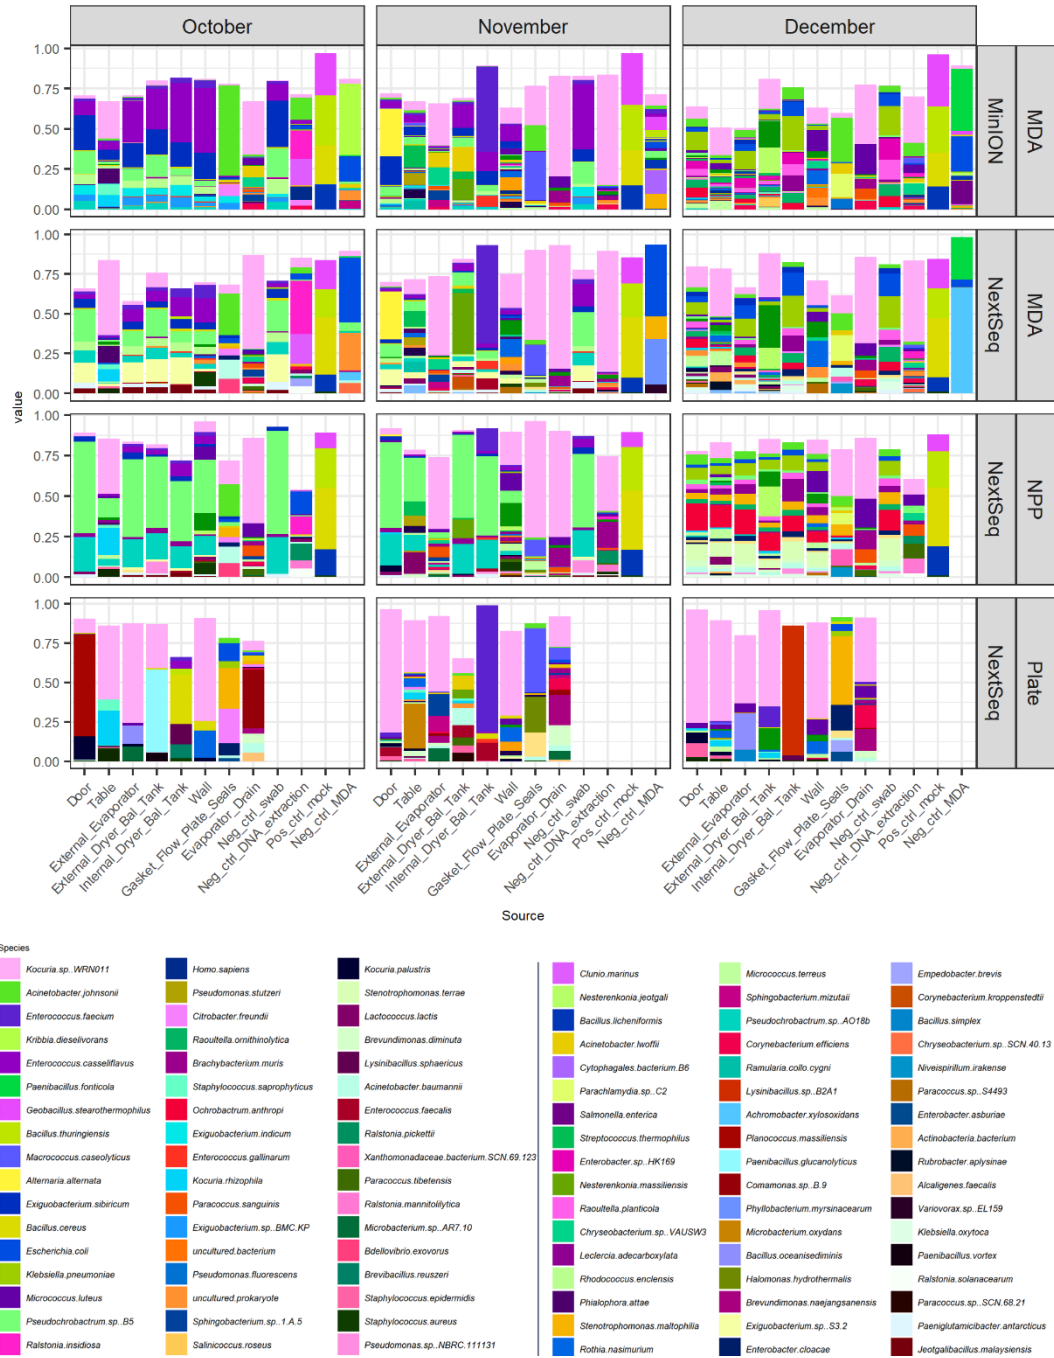

879

880 Figure 3. Species level classification of MinION and NextSeq sequenced  
881 environmental samples.

882 Taxonomic assignment of MinION and NextSeq sequenced samples generated  
883 following the use of different pre-processing and sequencing methods. Pre-  
884 processing methods include MDA amplification, no pre-processing (NPP), and

885 spread plating on BHI before washing colonies, pelleting, and treating as a  
886 metagenomic sample (Plate). Species level classification was performed using LAST  
887 (for MinION) and Diamond (for NextSeq) alignment of reads against the NR  
888 database and classification with MEGAN (LR for MinION). Species present in at least  
889 5% in at least one sample are shown.

890



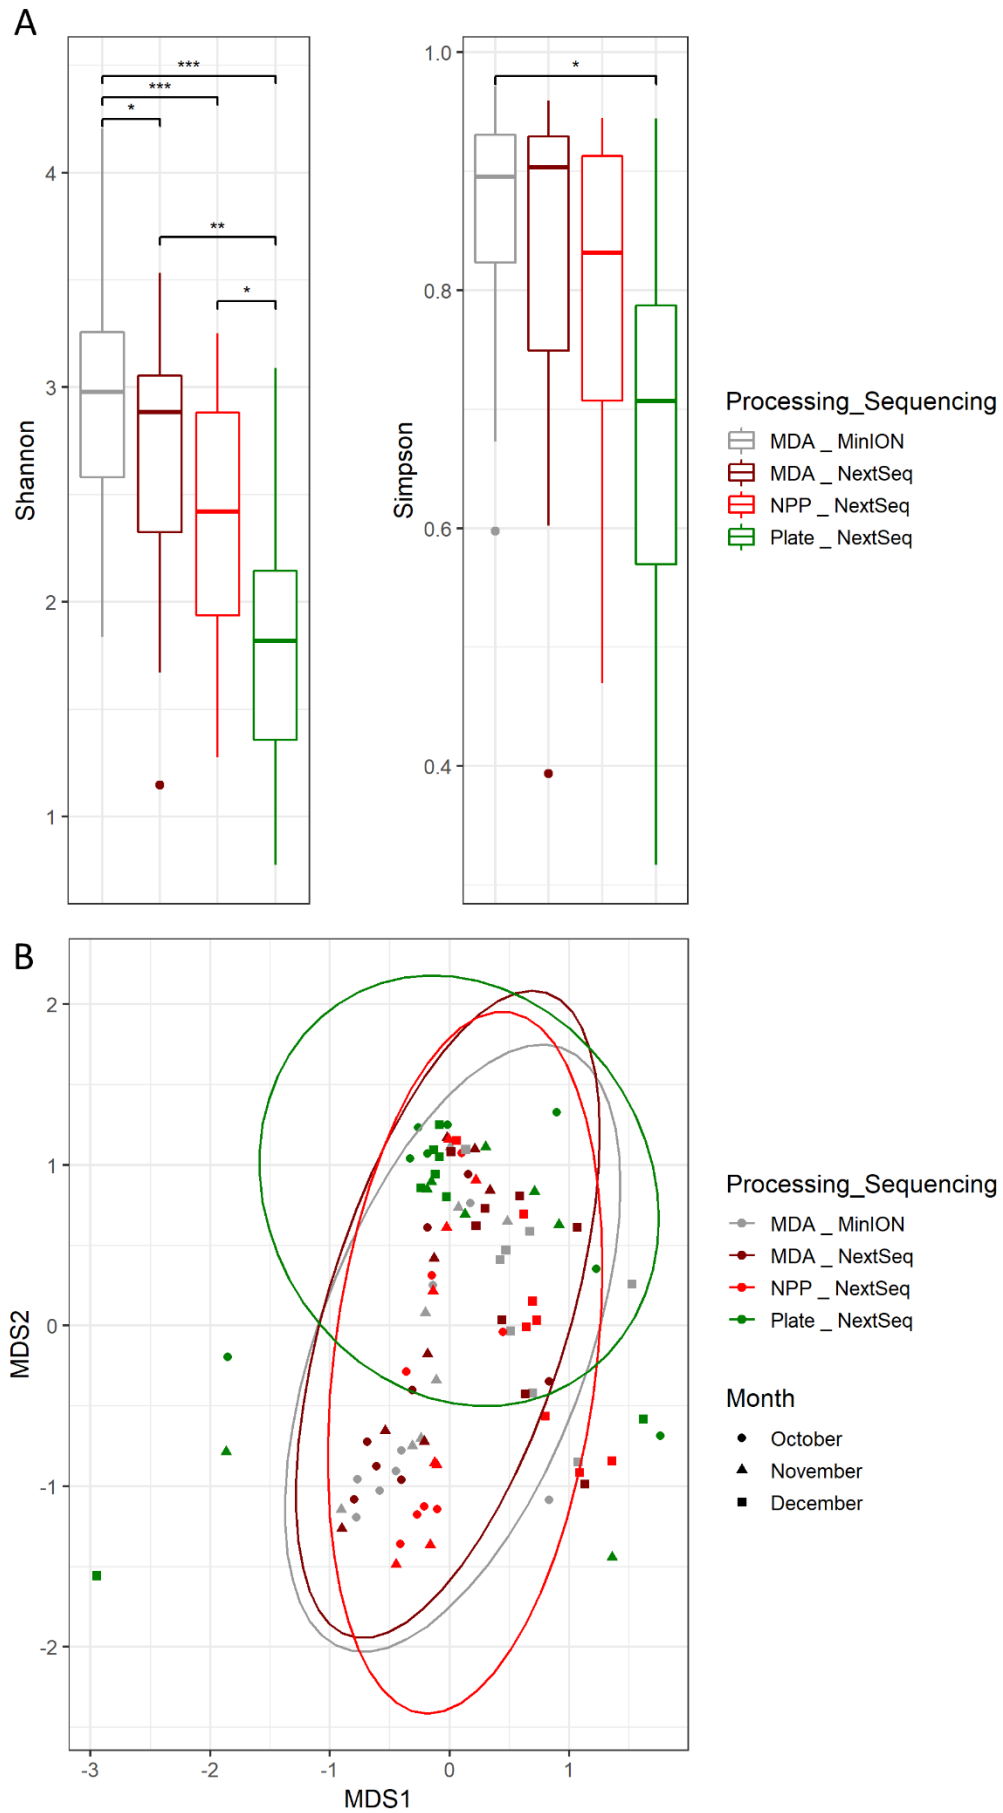

892 Figure 4. Diversity analysis.

893 A. Shannon and Simpson alpha diversity analysis.

894 B. Bray Curtis multiple displacement scaling (MDS) beta diversity analysis.

895 (\*\*\*) =  $p < 0.001$ , \*\* =  $p < 0.01$ , \* =  $p < 0.05$ ). Controls are excluded from

896 these calculations and figures.

897

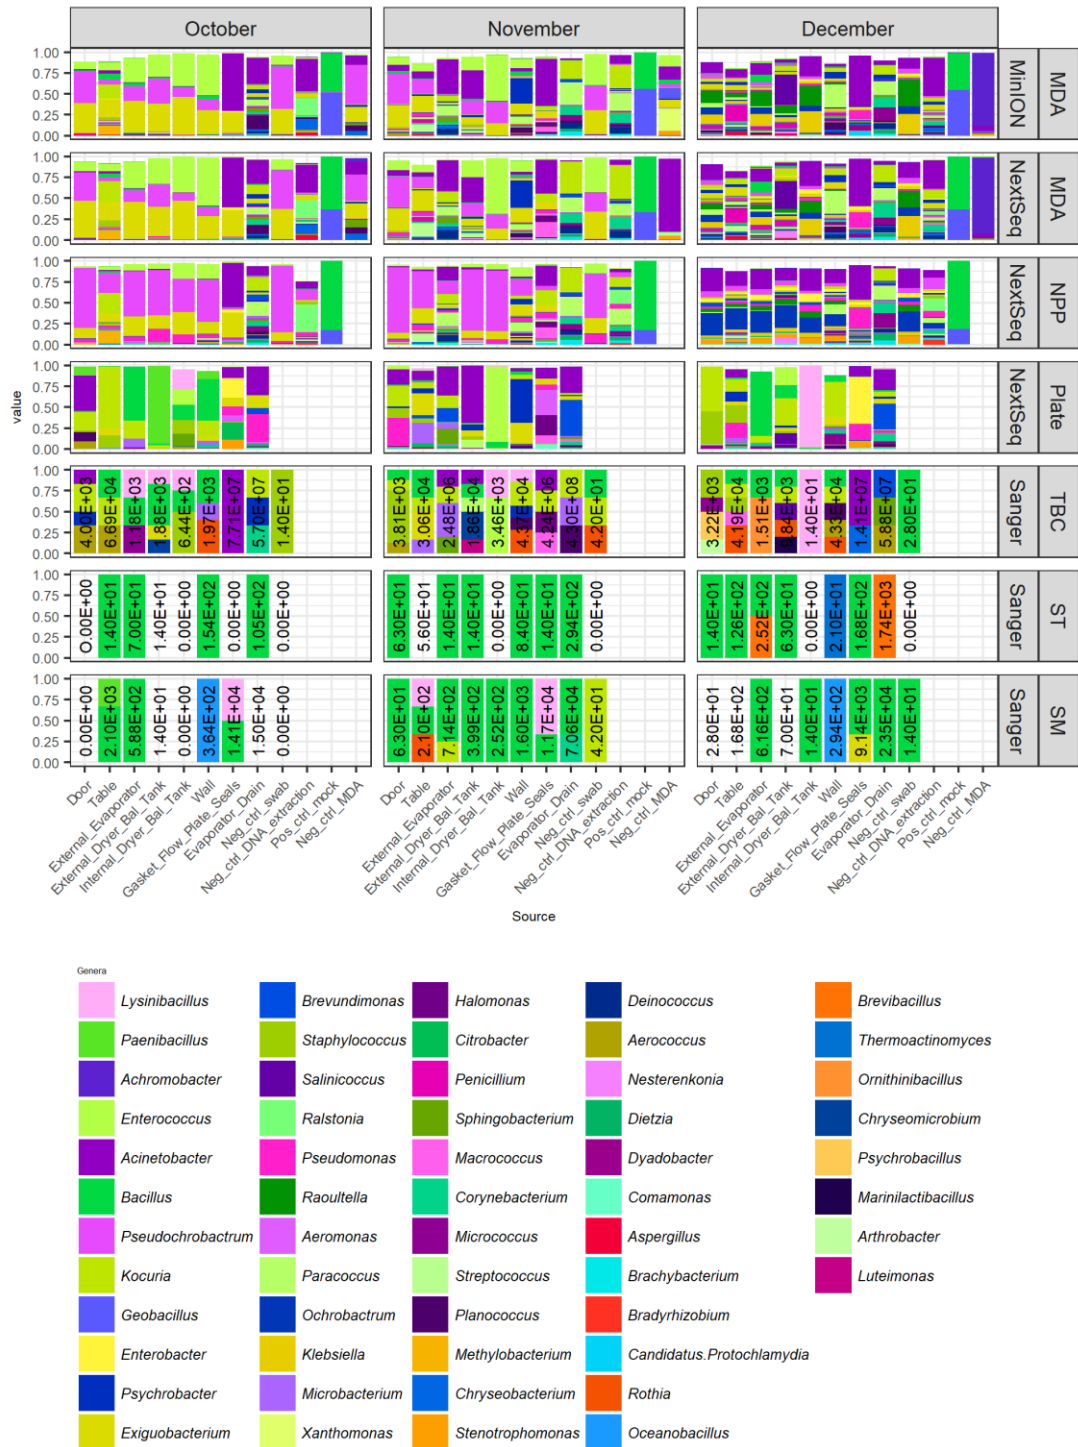

898

899 Figure 5. Genus level classification of environmental samples and controls following

900 different pre-processing methods and sequencing methods.

901 MEGAN LCA based genera level classification of MinION and NextSeq sequences.

902 Also depicted are Sanger results to genus level for morphologically different

903 colonies from each sample (TBC) along with thermophilic sporeformer enriched (ST)

904 and mesophilic sporeformer enriched (SM) counts. Also included are CFU / swab  
905 counts for each culturing type. Sanger results represent relative abundance of a  
906 subset of morphologically distinct isolates rather than total isolates.

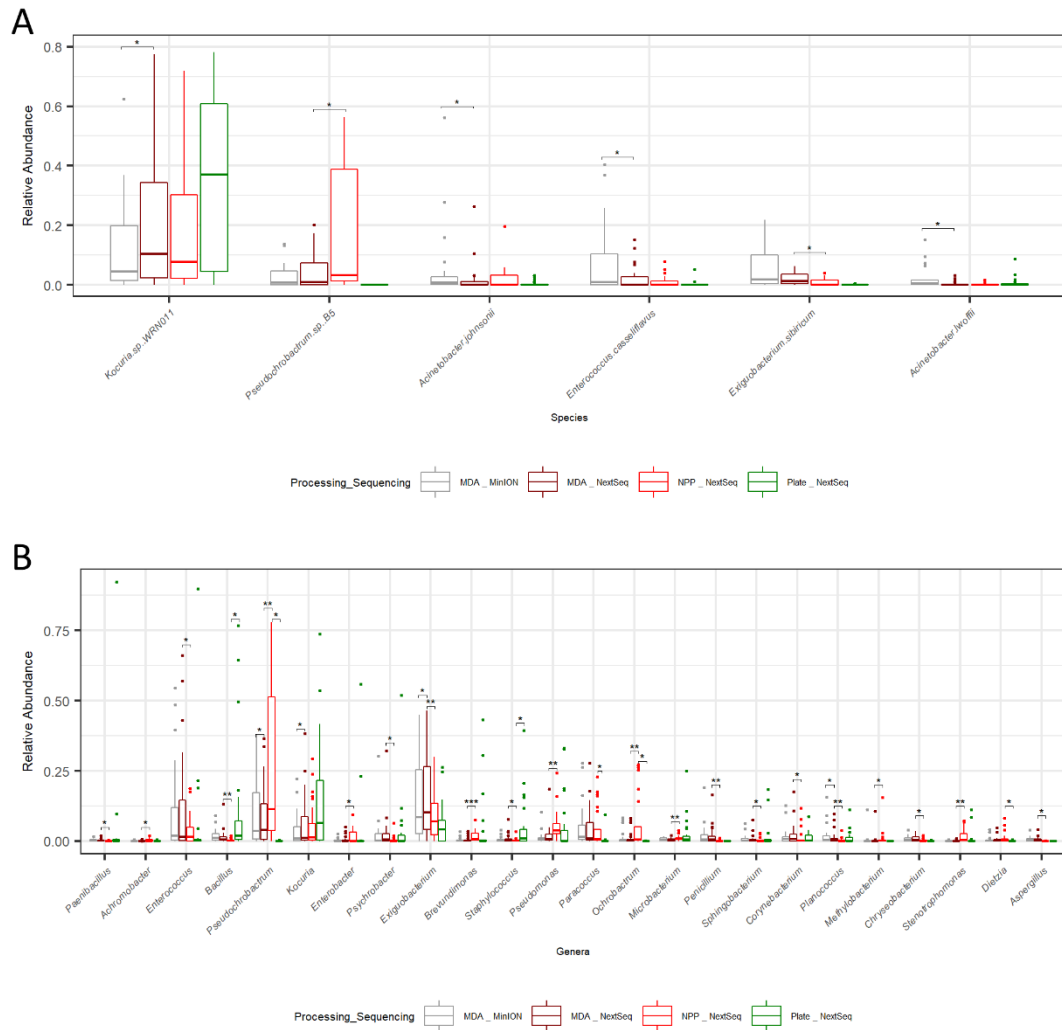

907

908 Figure 6 Significant differences in the relative abundance of taxa based on  
909 processing and sequencing method.

910 A. Significant species level differences due to sequencing and processing methods  
911 on environmental samples. Controls are excluded from these calculations and  
912 figures.

913 B. Significant genera level differences in relative abundance due to sequencing and  
914 processing methods on environmental samples. Controls are excluded from these  
915 calculations and figures.

916 **Tables**

917 Table 1. High quality MAGs.

| Month    | Sample                      | Bin | Kaiju assignment                                                                                     | Megan assignment                                                                                      | Percent Complete | Percent Contamination |
|----------|-----------------------------|-----|------------------------------------------------------------------------------------------------------|-------------------------------------------------------------------------------------------------------|------------------|-----------------------|
| October  | Positive control (mock)     | 2   | <i>Geobacillus stearothermophilus</i>                                                                | <i>Geobacillus stearothermophilus</i>                                                                 | 91.37            | 1.1235                |
| October  | Evaporator Drain            | 5   | <i>Planococcus plakortidis</i> /<br><i>Planococcus maitriensis</i> /<br><i>Planococcus maritimus</i> | <i>Planococcus plakortidis</i> /<br><i>Planococcus maritimus</i> /<br><i>Planococcus rifietoensis</i> | 82.41            | 0.6622                |
| October  | Gasket/Flow Plate Seal      | 5   | <i>Exiguobacterium sp. RIT341</i> /<br><i>Exiguobacterium indicum</i>                                | <i>Exiguobacterium indicum</i> /<br><i>Exiguobacterium acetylicum</i>                                 | 81.9             | 0.6578                |
| October  | Table                       | 14  | <i>Enterococcus casseliflavus</i>                                                                    | <i>Enterococcus casseliflavus</i>                                                                     | 82.77            | 1.4622                |
| November | Positive control (mock)     | 1   | <i>Bacillus licheniformis</i>                                                                        | <i>Bacillus licheniformis</i>                                                                         | 94.23            | 0.4149                |
| November | Evaporator Drain            | 7   | <i>Paracoccus chinensis</i>                                                                          | <i>Paracoccus chinensis</i>                                                                           | 93.03            | 1.1235                |
| November | Gasket/Flow Plate Seal      | 1   | <i>Macrocooccus caseolyticus</i>                                                                     | <i>Macrocooccus caseolyticus</i>                                                                      | 90.35            | 1.1049                |
| November | External Dryer Balance Tank | 3   | <i>Nesterenkonia massiliensis</i>                                                                    | <i>Nesterenkonia massiliensis</i>                                                                     | 91.32            | 1.07                  |
| December | Positive control (mock)     | 3   | <i>Bacillus licheniformis</i>                                                                        | <i>Bacillus licheniformis</i>                                                                         | 96.29            | 0.0829                |
| December | External Dryer Balance Tank | 1   | <i>Kocuria sp. CPCC 104605</i> /<br><i>Kocuria sp. ZOR0020</i>                                       | <i>Kocuria sp. ZOR0020</i>                                                                            | 81.35            | 0.6578                |

918 Taxonomy was assigned to metaBAT2 binned contigs by Megan LR and open reading frames of these contigs by Kaiju. If more than one species  
919 assigned, the bold species represents the top hit per classifier. Bin quality determined by checkM.

920
